# Supplementary material
Source: PubMed Central journal article supplement (PMC4875430)
Supplement: 13238_2013_3053_MOESM2_ESM.pdf [file 13238_2013_3053_MOESM2_ESM.pdf]

## Supporting Information

SI Table 1. Primers for BIK1 and BAK1 point mutation

| Primers               | Sequences                        |
|-----------------------|----------------------------------|
| BIK1-S71A-upstream    | AAACTTCAGACCTGATGCTGTGATCGGAGA   |
| BIK1-S71A-downstream  | GCATCAGGTCTGAAGTTTCTTGTGGCGA     |
| BIK1-D202A-upstream   | CAAAGTGATATACCGAGCCATTAAAGCCTC   |
| BIK1-D202A-downstream | GCTCGGTATATCACTTTGACGGGATCGCTG   |
| BIK1-S206A-upstream   | ATACCGAGACATTAAAGCCGCGAACATCTTA  |
| BIK1-S206A-downstream | CGGCTTTAATGTCTCGGTATATCACTTTGAC  |
| BIK1-S233A-upstream   | TCCAATGGGTGATTTGGCTTATGTTAGTAC   |
| BIK1-S233A-downstream | GCCAAATCACCCATTGGACCGTCTCTAG     |
| BIK1-S236A-upstream   | GGTGATTTGAGTTATGTTGCTACAAGGGTCAT |
| BIK1-S236A-downstream | GCAACATAACTCAAATCACCCATTGGACCG   |
| BIK1-S237A-upstream   | TTTGAGTTATGTTAGTGCAAGGGTCATGG    |
| BIK1-S237A-downstream | CACTAACATAACTCAAATCACCCATTGGAC   |
| BIK1-S237D-upstream   | TTTGAGTTATGTTAGTGACAGGGTCATGGG   |
| BIK1-S237D-downstream | GTCATAACATAACTCAAATCACCCATTGGAC  |
| BIK1-S242A-upstream   | TACAAGGGTCATGGGTGCTTATGGGTAC     |
| BIK1-S242A-downstream | CACCCATGACCCTTGTACTAACATAACTCA   |
| BIK1-S242D-upstream   | TACAAGGGTCATGGGTGATTATGGGTAC     |
| BIK1-S242D-downstream | TCACCCATGACCCTTGTACTAACATAACTCA  |
| BIK1-Y168F-upstream   | ATTCAGAAGAGGTGCATTTTTTAAGCCAC    |
| BIK1-Y168F-downstream | AATGCACCTCTTCTGAATAGATGATTCTCA   |
| BIK1-Y214F-upstream   | CTTACTTGATGCGGACTTCAACGCAAAC     |
| BIK1-Y214F-downstream | AAGTCCGCATCAAGTAAGATGTTCCGAGGCT  |
| BIK1-Y250F-upstream   | TACGCCGCGCCTGAGTTCATGTCATCA      |
| BIK1-Y250F-downstream | AACTCAGGCGCGGCGTACCATAAGTACC     |
| BAK1-N421A-upstream   | AGATGTGAAAGCTGCAGCTATTTTGTGGA    |
| BAK1-N421A-downstream | GCTGCAGCTTTCACATCTCGATGAATAATC   |

SI Table 2. Comparison of phosphopeptide quantitation using one-charge-state vs multi-charge-state method <sup>a</sup>

| BIK1 phosphorylation site                 | S71          | S206        | S236       | S236+T237 | T368         |
|-------------------------------------------|--------------|-------------|------------|-----------|--------------|
| BIK1-S233A<br>(multi-charge state )       | 168.6%±20.3% | 128.0%±9.2% | 13.2%±1.0% | 8.2%±0.8% | 141.4%±14.2% |
| BIK1-S233A<br>(single-charge state )      | 145.6%±1.5%  | 122.2%±7.4% | 11.7%±0.6% | 8.3%±0.3% | 122.1%±2.0%  |
| Variation between two ratios <sup>b</sup> | 10.4%        | 3.3%        | 8.9%       | 0.4%      | 10.4%        |

<sup>a</sup>Relative quantitation of phosphopeptides was determined using either multiple peptide variants with different charge states or a single peptide variant of the highest abundance. The ratio represents relative change of phosphopeptide levels from S233A vs that from the wide-type. STD represents quantitation variation from three experimental replicates.

<sup>b</sup>Relative STD between the two ratios determined using different methods reflect quantitative consistency.

SI Table 3. Summary of BIK1 Ser/Thr autophosphorylation sites *in vitro* identified by high-resolution MS analysis

| Phosphorylation site | Peptide sequence                          | Mass error (ppm) | PLGS score |
|----------------------|-------------------------------------------|------------------|------------|
| S71                  | NFRPD <b>p</b> SVIGEGGF <del>G</del> CVFK | 3.85             | 9.6        |
| S360+T368            | ALQQLQDNLGK <b>p</b> SQTNPVKD <b>p</b> TK | 0.16             | 8.4        |
| T362+T368            | ALQQLQDNLGK <b>p</b> SQTNPVKD <b>p</b> TK | 0.61             | 9.4        |
| S233+S236            | DGPMGDL <b>p</b> SYV <b>p</b> STR         | 4.45             | 7.9        |
| S236+T237            | DGPMGDLSYV <b>p</b> SpTR                  | 0.41             | 7.5        |
| S206                 | A <b>p</b> SNILLDADYNAK                   | 1.32             | 9.1        |
| S54+T56              | <b>p</b> SF <b>p</b> TFNELK               | 3.73             | 7.2        |
| S253                 | VMGTYGYAAPEYMS <b>p</b> SGHLNAR           | 6.85             | 8.6        |
| S252+S253            | VMGTYGYAAPEYMS <b>p</b> SpSGHLNAR         | 8.34             | 9.0        |
| T242                 | VMG <b>p</b> TYGYAAPEYMSSGHLNAR           | 0.85             | 8.3        |
| S129                 | EWLTEINYLGQL <b>p</b> SHPNLVK             | 3.23             | 7.9        |
| T314                 | LD <b>p</b> TQYLPEEAVR                    | 2.71             | 7.1        |
| S48                  | TEGEIL <b>p</b> SSTPVK                    | 2.55             | 7.8        |
| S49                  | TEGEIL <b>p</b> SpSTPVK                   | 4.55             | 7.4        |

\*All the phosphosites were confirmed by manual inspection of their MS/MS spectra (shown in SI Fig. S2). A plus sign indicates both sites are phosphorylated.

SI Table 4. Summary of BIK1 KM transphosphorylation sites installed by BAK1-CD identified using high-resolution MS analysis

| Phosphorylation site <sup>a</sup> | Peptide sequence                          | Mass error (ppm) | PLGS score |
|-----------------------------------|-------------------------------------------|------------------|------------|
| S360/T362+T368                    | ALQQLQDNLGKPSQTNPVKD <b>p</b> TK          | 10.01            | 6.2        |
| S236                              | DGPMGDLP <b>p</b> SYV <b>p</b> STR        | -3.69            | 7.5        |
| S236+T237                         | DGPMGDLSYV <b>pSp</b> TR                  | -2.02            | 7.1        |
| S71                               | NFRPD <b>p</b> SVIGEGGFVCVFK              | -0.22            | 6.7        |
| S48                               | TEGEIL <b>p</b> SSTPVK                    | -5.42            | 6.4        |
| S206                              | A <b>p</b> SNILLDADYNAK                   | 2.12             | 7.2        |
| T242/S252                         | VMG <b>p</b> TYGYAAPEYMS <b>p</b> SGHLNAR | 5.24             | 7.3        |

<sup>a</sup>A slash indicates either site can be phosphorylated, which is not ambiguously determined by MS/MS analysis. A plus sign indicates both sites can be phosphorylated.

SI Table 5. Relative quantitation of site-specific autophosphorylation in BIK1 Ser/Thr mutants vs wild-type (WT)

|         | BIK1 phospho site | S71          | S206         | T368        | T362/S360 +T368 | S233/S236   | S236+T237   | T242        |
|---------|-------------------|--------------|--------------|-------------|-----------------|-------------|-------------|-------------|
|         | WT                | 100.0%±11.3% | 100.0%±1.8%  | 100.0%±3.7% | 100.0%±1.3%     | 100.0%±4.4% | 100.0%±5.6% | 100.0%±8.3% |
|         | KM                | 5.0%±0.3%    | 6.3%±0.6%    | 4.4%±0.1%   | 13.5%±0.2%      | 1.9%±0.2%   | 1.4%±0.1%   | 5.0%±0.3%   |
| Group 1 | T237A             | 12.7%±1.5%   | 7.7%±0.9%    | 28.4%±1.9%  | 12.1%±1.3%      | 1.1%±0.1%   | ND          | 24.4%±7.7%  |
|         | T237D             | 102.7%±12.5% | 52.0%±2.9%   | 57.1%±6.1%  | 37.9%±4.5%      | 1.2%±0.2%   | ND          | 55.1%±3.2%  |
|         | T242A             | 3.7%±0.7%    | 8.5%±0.7%    | 9.4%±0.4%   | 28.2%±1.8%      | 1.4%±0.1%   | ND          | ND          |
|         | T242D             | 1.6%±0.1%    | 1.0%±0.1%    | 1.1%±0.1%   | 0.8%±0.0%       | 2.1%±0.2%   | ND          | ND          |
| Group 2 | S233A             | 145.6%±1.5%  | 122.2%±7.4%  | 122.1%±2.0% | 74.6%±2.0%      | 11.7%±0.6%  | 8.3%±0.3%   | 40.3%±3.0%  |
|         | S236A             | 103.5%±5.2%  | 178.7%±8.8%  | 109.0%±5.8% | 172.2%±4.8%     | 2.6%±0.1%   | ND          | 39.7%±3.6%  |
| Group 3 | S71A              | ND           | 120.8%±10.2% | 92.7%±5.7%  | 129.4%±10.9%    | 74.4%±5.7%  | 98.7%±12.6% | 62.7%±8.1%  |
|         | S206A             | 85.8%±10.7%  | ND           | 68.4%±2.0%  | 72.2%±10.8%     | 104.3%±7.8% | 52.6%±9.4%  | 81.2%±4.4%  |

\*Standard deviations of relative percentages represent variation from experimental triplicates. "ND" indicates no detection of the peptide signal in MS analysis.

SI Table 6. Relative quantitation of site-specific transphosphorylation of BIK1 mutants by BAK1-CD vs autophosphorylation on BIK1 WT

| BIK1 phosphosite     | S71          | T368        | S206        | S360/T362+T368 | S236        | S236+T237   | T242        |
|----------------------|--------------|-------------|-------------|----------------|-------------|-------------|-------------|
| BIK1 WT              | 100.0%±14.8% | 100.0%±3.7% | 100.0%±0.4% | 100.0%±10.4%   | 100.0%±3.4% | 100.0%±2.2% | 100.0%±3.5% |
| BIK1 T242A + BAK1 KM | 1.0%±0.1%    | 2.2%±0.2%   | 8.2%±0.2%   | 0.4%±0.1%      | 8.9%±0.9%   | ND          | ND          |
| BIK1 T242A + BAK1 WT | 1.2%±0.1%    | 2.2%±0.4%   | 94.0%±10.6% | 5.7%±1.0%      | 89.2%±7.4%  | 4.6%±1.0%   | ND          |
| BIK1 T242D + BAK1 KM | 0.7%±0.1%    | 1.5%±0.1%   | 0.9%±0.2%   | 1.0%±0.1%      | 30.0%±1.8%  | 1.2%±0.1%   | ND          |
| BIK1 T242D + BAK1 WT | 61.7%±6.1%   | 1.6%±0.2%   | 1.2%±0.1%   | 1.0%±0.1%      | 106.3%±2.3% | 3.9%±0.5%   | ND          |

\*Standard deviations of relative percentages represent variation from experimental triplicates. "ND" indicates no detection of the peptide signal in MS analysis.

SI Table 7. Relative quantitation of site-specific transphosphorylation of BAK1-CD KM installed by BIK1 Ser/Thr mutants vs BIK1 WT

| BAK1-CD phosphosite   | T446         | T446-450     | S290         | T333+S339    | T455        |
|-----------------------|--------------|--------------|--------------|--------------|-------------|
| WT <sup>BIK1</sup>    | 100.0%±7.6%  | 100.0%±18.7% | 100.0%±4.7%  | 100.0%±18.5% | 100.0%±3.7% |
| S71A <sup>BIK1</sup>  | 85.8%±10.6%  | 48.4%±3.5%   | 91.9%±2.5%   | ND           | 102.8%±4.5% |
| S206A <sup>BIK1</sup> | 94.0%±5.8%   | 81.5%±8.4%   | 115.5%±12.5% | 72.2%±4.5%   | 118.4%±4.8% |
| S233A <sup>BIK1</sup> | 100.5%±14.0% | 118.6%±2.2%  | 44.2%±1.2%   | 49.7%±6.3%   | 84.0%±4.4%  |
| S236A <sup>BIK1</sup> | 74.2%±13.8%  | 52.1%±4.7%   | 46.4%±2.4%   | 18.0%±1.9%   | 76.7%±1.4%  |
| T237A <sup>BIK1</sup> | 28.6%±0.5%   | 43.5%±2.3%   | 33.7%±2.3%   | 20.2%±4.7%   | 37.4%±2.7%  |
| T237D <sup>BIK1</sup> | 50.0%±1.8%   | 42.1%±2.1%   | 125.3%±9.0%  | 25.4%±1.5%   | 110.6%±6.1% |
| T242A <sup>BIK1</sup> | 16.6%±0.2%   | 66.2%±5.4%   | 19.3%±1.3%   | 16.1%±0.2%   | 20.2%±0.3%  |
| T242D <sup>BIK1</sup> | 26.1%±4.9%   | 72.9%±4.5%   | 47.6%±1.1%   | 8.7%±0.5%    | 29.7%±2.3%  |
| D202A <sup>BIK1</sup> | 20.8%±2.9%   | 21.7%±3.0%   | 24.2%±3.3%   | 35.9%±4.1%   | 15.5%±2.3%  |

\*Standard deviations of relative percentages represent variation from experimental triplicates. "ND" indicates no detection of the peptide signal in MS analysis. D202A is the kinase dead mutant of BIK1.

SI Table 8A. Summary of FLS2-CD transphosphorylation sites installed by BIK1 identified using high-resolution MS analysis

| Phosphorylation site | Peptide sequence                 | Mass error (ppm) | PLGS score |
|----------------------|----------------------------------|------------------|------------|
| T941                 | ILGFAWESGK <b>p</b> TK           | 2.28             | 7.4        |
| S1084                | QRPTSLNDED <b>p</b> SQDMTLR      | -0.07            | 7.8        |
| S938                 | ILGFAWE <b>p</b> SGK <b>p</b> TK | -2.58            | 7.4        |
| S1115                | VLDMELGD <b>p</b> SIVSLK         | 2.89             | 7.5        |
| S906                 | EF <b>p</b> SAESDKWIFYTEAK       | 4.52             | 6.4        |

\*All the phosphosites were confirmed by manual inspection of their MS/MS spectra (shown in SI Fig. S3).

SI Table 8B. Summary of FLS2-CD transphosphorylation sites installed by BAK1 identified by high-resolution MS analysis (cited from reference 14 in the text)

| Phosphorylation site | Peptide sequence                            | Mass error for peptide identification |
|----------------------|---------------------------------------------|---------------------------------------|
| S869                 | ELEQATD <b>p</b> SFN SANIIGSSSLSTVYK        | 2.6 ppm                               |
| S906                 | EF <b>p</b> SAESDKWIFYTEAK                  | 4.3 ppm                               |
| S961                 | ALVLPFMENGNLEDTIHG <b>p</b> SAAPIGSLL<br>EK | 1.2 ppm                               |
| S1115                | VLDMELGD <b>p</b> SIVSLK                    | 3.8 ppm                               |



SI Table 9. BIK1 *in vitro* phosphotyrosine sites identified by high-resolution MS analysis

| Phosphorylation site | Peptide sequence       | Mass error (ppm) | PLGS score |
|----------------------|------------------------|------------------|------------|
| Y168                 | GApYFKPLPWFLR          | 0.62             | 8.4        |
| Y214                 | ASNILLDADpYNAK         | 1.72             | 7.9        |
| Y250                 | VMGTYGYAAPEpYMSSGHLNAR | 3.56             | 7.7        |

\*Y168 and Y214 phosphorylation were verified by manual inspection of their MS/MS spectra (shown in SI Fig. S4). Y250 phosphorylation is automatically assigned yet its MS/MS spectrum is not conclusive

SI Table 10. Relative quantitation of site-specific autophosphorylation in BIK1 Tyr mutants vs WT

| BIK1 phospho site | S71        | S206       | T368       | T362/S360+T368 | S236/S233   | S236+T237   | T242         |
|-------------------|------------|------------|------------|----------------|-------------|-------------|--------------|
| Y168F             | 62.9%±5.6% | 49.2%±5.5% | 68.0%±7.1% | 68.9%±4.1%     | 100.5%±8.0% | 71.1%±10.5% | 102.8%±13.8% |
| Y250F             | 22.5%±4.2% | 9.3%±1.6%  | 27.3%±0.4% | 14.4%±1.9%     | 51.7%±1.7%  | 17.5%±1.1%  | 97.5%±2.9%   |
| Y214F             | 75.4%±6.6% | 5.5%±0.8%  | 79.3%±3.3% | 71.6%±2.6%     | 11.3%±1.1%  | 54.0%±3.6%  | ND           |

\*Standard deviations of relative percentages represent variation from experimental triplicates. "ND" indicates no detection of the peptide signal in MS analysis.

SI Table 11. Relative quantitation of site-specific transphosphorylation in BAK1-CD KM installed by BIK1 Tyr mutants vs WT

| BAK1 phosphosite      | T446        | T446-450     | S290        | T333+S339    | T455         |
|-----------------------|-------------|--------------|-------------|--------------|--------------|
| WT <sup>BIK1</sup>    | 100.0%±4.6% | 100.0%±15.9% | 100.0%±1.9% | 100.0%±16.5% | 100.0%±14.9% |
| Y168F <sup>BIK1</sup> | 97.8%±15.2% | 116.9%±22.4% | 88.2%±2.6%  | 65.9%±6.3%   | 100.0%±8.3%  |
| Y214F <sup>BIK1</sup> | 47.2%±6.9%  | 54.2%±7.2%   | 73.0%±12.3% | 44.6%±3.9%   | 66.6%±3.7%   |
| Y250F <sup>BIK1</sup> | 20.1±1.2%   | 49.7%±3.8%   | 50.7%±3.3%  | 29.8%±1.9%   | 94.4%±10.6%  |
| D202A <sup>BIK1</sup> | 20.8%±2.9%  | 21.7%±3.0%   | 24.2%±3.3%  | 43.7%±4.1%   | 15.5%±2.3%   |

\*Standard deviations of relative percentages represent variation from experimental triplicates. D202A is the kinase dead mutant of BIK1.
